# Supplementary material
Source: PubMed Central journal article supplement (PMC3433580)
Supplement: NIHMS388511-supplement-Supp_Table_S1-S2.pdf [file NIHMS388511-supplement-Supp_Table_S1-S2.pdf]

## Supplementary materials:

### Tables

**Table 1.** Membrane parameters of TTXrh, TTXrl, and TTXs of small DRG neurons at different temperatures

|       | Cell type   | RMP (mV) | Rheobase (pA) | Threshold (mV) | AP width ( $W_{1/2}$ , ms) | AHP amplitude (mV) | AHP peak (mV) | Input R ( $M\Omega$ ) |
|-------|-------------|----------|---------------|----------------|----------------------------|--------------------|---------------|-----------------------|
| 29 °C | TTXs, n=8   | -49±2    | 15±3          | -29.5±1.3      | 2.9±0.2                    | 24.0±2.8           | -53.5±2.4     | 728±137               |
|       | TTXrh, n=6  | -54±2    | 88±12†        | -10.4±3.2†     | 3.7±0.4†                   | 40.9±2.2†          | -49.9±2.6     | 465±50                |
| 24 °C | TTXs, n=12  | -50±1    | 26±5*         | -25.1±0.9*     | 3.4±0.2*                   | 23±1.3             | -47.9±1.1*    | 742±106               |
|       | TTXrh, n=9  | -52±2    | 58±8*†        | -4.7±2.0†      | 5.3±0.4*†                  | 40.1±1.6†          | -44.9±1.9     | 825±106*              |
|       | TTXrl, n=11 | -50±4    | 41±9          | -11.3±2.0†‡    | 5.3±0.6†                   | 32.1±1.8†‡         | -43.4±1.6     | 740±115               |
| 15 °C | TTXs, n=12  | -50±1    | 13±2          | -18.8±1.2*     | 15.8±1.7*                  | 18.7±1.4           | -38.3±1.0*    | 1725±254*             |
|       | TTXrh, n=9  | -53±3    | 33±4*†        | -3.7±1.8†      | 13.1±1.1*                  | 35.1±1.4*†         | -38.8±1.5*    | 1206±155*             |
|       | TTXrl, n=11 | -51±4    | 31±7†         | -4.2±1.3*†     | 14.3±2.0*                  | 34.2±1.9†          | -38.4±2.0*    | 1500±247*             |
| 10 °C | TTXs, n=8   | -47±1    | 14±2          | -17.2±1.7*     | 24.1±3.3*                  | 18.1±1.2           | -35.3±1.6*    | 1803±282*             |
|       | TTXrh, n=9  | -52±3    | 32±4*†        | -1.4±1.6*†     | 15.3±1.5*†                 | 35.0±2.3†          | -36.4±2.5*    | 2050±334*             |

TTX sensitivity was first assessed under voltage-clamp configuration by testing the effects of 500 nM TTX on voltage-activated  $Na^+$  currents. Cells were then current-clamped and given a series of current steps for a period of 4 s (TTXrh, TTXrl) or 600 ms (TTXs). The tests were performed at 29 °C, 24 °C, 15 °C, and 10 °C. Data represent mean  $\pm$  SEM. \*  $P < 0.05$ , same cell type, temperatures of 24 °C, 15 °C and 10 °C vs. 29 °C. †  $P < 0.05$ , same temperature, TTXrh vs. TTXs or TTXrl vs. TTXs. ‡  $P < 0.05$ , same temperature, TTXrl vs. TTXrh. RMP, resting membrane potential; AP, action potential; AHP, afterhyperpolarization; Input R, input resistance.

**Table 2.** Effects of 4-AP on membrane parameters of TTXr and TTXs small DRG neurons

| Cell type     | Test type | RMP (mV)  | Rheobase (pA) | Threshold (mV) | AP width ( $W_{1/2}$ ms) | AHP amplitude (mV) | AHP peak mV | Input R ( $M\Omega$ ) |
|---------------|-----------|-----------|---------------|----------------|--------------------------|--------------------|-------------|-----------------------|
| TTXr<br>n = 6 | Control   | -53.4±2.9 | 84.2±14.2     | -12.2±2        | 5.9±0.6                  | 39.0±2.2           | -49.7± 1.2  | 645±130               |
|               | 4-AP      | -53.0±3.2 | 49.2±14.9*    | -10.8±1.4      | 9.6±1.3*                 | 32.9±1.8*          | -45.3 ±1.5* | 658±198               |
| TTXs<br>n = 6 | Control   | -48.8±1.2 | 28.6±5.1      | -24.3±1.0      | 3.28±0.9                 | 22.6±2.0           | -46.8±1.6   | 794±165               |
|               | 4-AP      | -47.7±0.9 | 15.7±4.3*     | -23.4±1.5      | 5.1±0.4*                 | 19.3±2.4           | -42.7±2.1*  | 989±239               |

Membrane parameters were recorded before (control) and after exposing cells to 4-AP (100  $\mu$ M, 2 minutes). Experiments were performed at 24 °C. Current pulses were delivered as described in Table 1. Data represent mean  $\pm$  SEM. \*P < 0.05, 4-AP vs. control within same cell type.
